# Supplementary material for: Evaluating Elimination Thresholds and Stopping Criteria for Interventions Against the Vector-borne Macroparasitic Disease, Lymphatic Filariasis, Using Mathematical Modelling
Source: Research Square preprint supplement (doi:10.21203/rs.3.rs-898556/v1), 2021-09-30
Supplement: Supplementary file 1 [file f483eac7b734207ee9001e47.docx]

# S1 Supporting Information. Lymphatic filariasis model descriptions and Monte Carlo p-values for pre- and post-MDA data.

**EPIFIL model description and methods**

## The mathematical model of LF transmission dynamics

We employed a genus specific mosquito-vectored transmission model of LF to carry out the modelling work in this study 1-7. Briefly, the state variables of this hybrid coupled partial differential and differential equation model vary over age (*a*) and/or time (*t*), representing changes in the pre-patent worm burden per human hostadult worm burden per human hostthe microfilariae (mf) level in the human host modified to reflect infection detection in a 1 mL blood samplethe average number of infective L3 larval stages per mosquito (*L*), and a measure of immunitydeveloped by human hosts against L3 larvae; and intensity of Circulating Filarial Antigen (CFA) (denoted by *A(a, t))*. The state equations comprising this model are:

The above equations involve partial derivatives of four state variables (*P* - pre-patent worm load; *W* - adult worm load; *M* - microfilaria intensity; *I* - immunity to acquiring new infection due to the pre-existing total worm load; *A* - intensity of CFA where *WT = W(a,t) + P(a,t)*). Given the faster time scale of infection dynamics in the vector compared to the human host, the infective L3-stage larval density in mosquito population is modelled by an ordinary differential equation essentially reflecting the significantly faster time-scale of the infection dynamics in the vector hosts. This allows us to make the simplifying assumption that the density of infective stage larvae in the vector population reaches a dynamic equilibrium (denoted by *L**) rapidly1, 2, 5, 8, 9. This basic coupled immigration-death structure of the model as well as its recent extensions has been extensively discussed previously1-3, 5, 8, 9. The effects of worm patency are captured by considering that at any time *t*, human individuals of age less than or equal to the pre-patency period, *τ*, will have no adult worms or mf, and the rate at which pre-patent worms survive to become adult worms in these individuals at *a > τ* is given by . The term enables us to account for the different establishment and development rates of the incoming L3-stage larvae as adult worms depending on the genus of mosquito vectors as expressed below:

for mosquitoes of *Anopheline* genus;

for mosquitoes of *Culicine* genus.

In the above, is the shape parameter of the negative binomial distribution on the mf uptake whereas r and are respectively the rate of initial increase and the maximum level of L3 larvae. See Table 1 for the description of all the model parameters and functions.

**Table 1** - **Description of EPIFIL model parameters and functions.**

| **Parameter** | **Definition (*units*)** | **Range** | **Refs** |
| --- | --- | --- | --- |
| ***λ*** | Number of bites per mosquito (*per month*) | [5, 15] | 1, 2, 5, 10, 11 |
| ***τ*** | Pre-patency period | [1, 9] | 12 |
| ***s*** | Proportion of female worms | 0.5 | - |
| ***μ*** | The worm mortality rate (*per month*) | [0.008, 0.018] | 1, 2, 5, 13-16 |
| ***α*** | Production rate of microfilariae per worm (*per month*) | [0.25, 1.5] | 1, 2, 5, 17 |
| ***γ*** | The death rate of the microfilariae (*per month*) | [0.08, 0.12] | 1, 5, 15, 17 |
| ***α2*** | Production rate of CFA (*per worm per month*) | [2, 8] | This study |
| ***γ2*** | Decay rate of CFA (*per month*) | [0.4, 0.5] | This study |
| ***g*** | Proportion of mosquitoes which pick up infection when biting an infected host | [0.251, 0.485] | 1, 5, 18 |
| ***κ*** | Maximum level of L3 given Mf density | [3, 5] | 1, 5 |
| ***k0*** | The basic location parameter of negative binomial distribution used in aggregation parameter  () | [0.000036, 0.000775] | 1, 5, 19, 20 |
| ***δ*** | Immunity waning rate (*per month*) | [0.001, 0.01] | 1, 5 |
| ***V/H*** | Ratio of number of vector to hosts |  | data |
| ***kLin*** | The linear rate of increase in the aggregation parameter defined above | [0.00000024, 0.282] | 1, 5, 19, 20 |
| ***σ*** | Death rate of mosquitoes (*per month*) | [1.5, 8.5] | 1, 5, 20 |
| ***ψ1*** | Proportion of L3 leaving mosquito per bite | [0.1, 0.8] | 17 |
| ***ψ2*** | The establishment rate1 | [0.00003, 0.00364] | 1, 2, 5, 21 |
| ***HLin*** | A threshold value used in*h(a)*to adjust the rate at which individuals of age *a* are bitten: linear rise from 0 at age zero to 1 at age *HLin* in years. | [240, 360] months | 1, 5, 9 |
| ***r*** | Gradient of Mf uptake2 | [0.04, 0.25] | 1, 5 |
| ***c*** | Strength of acquired immunity | [0.015, 0.025] | 1, 5 |
| ***IC*** | Strength of immunosuppression3 | [0.5, 5.5] | 1, 5 |
| ***SC*** | Slope of immunosuppression function4  (*per worm/month*) | [0.01, 0.20] | 1, 5 |
| ***Intervention-related parameters*** | | | |
| ***ω*** | Worm killing efficacy of drug (instantaneous) | dependent on drug regimen | 3 |
| ***ε*** | Microfilariae killing efficacy of drug (instantaneous) | dependent on drug regimen | 3 |
| ***δreduc*** | Reduction in the worm’s fecundity over a period of time *p* due to drug | dependent on drug regimen | 3 |
| ***p*** | A time period during which the drug remains efficacious in reducing the fecundity of the surviving adult worms | dependent on drug regimen | 3 |
| ***C*** | Percentage of the population administered the drug | data | data |
| ***MBRVC*** | Vector control (VC) modifies () where  , withfor when VC is implemented, otherwise. | data and estimates | 19, 20 |
| **Description** | **Mathematical expressions of the functions** | **Parameters** |  |
| Probability that an individual is of age *a****π(a)*** |  | Human age *a* in month, *A0*and *B0*estimated from country demographic data | 1, 5, 9 |
| Larvae establishment rate (modified by acquired immunity) ***Ω(a,t)*** |  | - proportion of L3 leaving mosquito per bite; - the establishment rate1 | - |
| Adult worm mating probability ***ϕ(W,k)*** |  | *k* – negative binomial aggregation parameter | 2, 5, 22 |
| Immunity to larval establishment ***g1(I)*** |  | *c* – strength of immunity to larval establishment | 1, 5 |
| Host immunosuppression  ***g2(WT)*** |  | *IC* – strength of immunosuppression;  *SC* – slope of immunosuppression | 1, 5 |

1The proportion of L3-stage larvae infecting human hosts that survive to develop into adult worms2.

2The gradient of Mf uptake *r* is a measure of the initial increase in the infective L3 larvae uptake by vector as *M* increases from 02, 9.

3 The facilitated establishment rate of adult worms due to parasite-induced immunosuppression in a heavily infected human host

4 The initial rate of increase by which the strength of immunosuppression is achieved as *W* increases from 023.

# Note MBR (monthly biting rate) serves as an input to initialize the model, measured as mosquito bites per person per month, the value of which may be obtained from entomological surveys conducted in study sites. In the absence of the observed MBR value, the model has been adapted to estimate it from the community-level Mf prevalence data.

## Modeling intervention by mass drug administration

Intervention by mass drug administration was modeled based on the assumptions that anti-filarial treatment with a combination drug regimen act by killing certain fractions of the populations of adult worms and microfilariae instantly after the drug administration24. These effects are incorporated into the basic model by calculating the population sizes of worms and microfilariae as follows:

where *dt* is a short time period since the *i*th MDA was administered. During this short time interval, a given proportion of adult worms and microfilariae are instantly removed. The parameters *ω* and *ε* are drug killing efficacy rates for the two life stages of the parasite while the parameter *C* represents the MDA coverage. Apart from instantaneous killing of microfilariae, the drug continues to kill the newly reproduced mf by any surviving adult worms at a rate *δreduc* for a period of time, *p*. We model this effect as follows:

We simulated LF intervention by running the model with fixed values of *ε*, *δreduc*, and *p* (here δreduc=1) for MDA coverage levels given by data. The worm-kill parameter, *ω*, was drawn from a uniform prior distribution such that the post-intervention data could inform this efficacy value. The first MDA round was implemented in the model by affecting the population sizes of worms and microfilariae from the baseline fits, and then the intervention is simulated forward in time for a number of years, with subsequent MDA rounds implemented annually.

## Modeling intervention by Vector Control

In addition to MDA, we also modeled the added effect of long-lasting insecticidal nets (LLINs) as described previously6. The impact of LLINs with three main actions against mosquito biting was modelled: 1) deterrence from entering the home (efficacy ), 2) inhibition of their ability to feed on humans (efficacy ), and 3) killing them (efficacy )25,26. To capture these effects, which decay over time as the larvicide efficacy declines exponentially at rate Λ, we adjust the term V/H to be appropriately modified according to the population coverage for LLINs ():

**Table 2. Monte Carlo p-values for pre- and post-MDA data.**

|  | **Age-stratified and overall Monte Carlo p-values for baseline data** | | | | | | | | | |
| --- | --- | --- | --- | --- | --- | --- | --- | --- | --- | --- |
|  | **0-9** | **10-19** | **20-29** | **30-39** | **40-49** | **50-59** | **60-69** | **70-79** | **Overall** |
| **DokanTofa** | 0.012 | 0.988 | 0.396 | 0.882 | 0.966 | 0.677 | 0.535 | 0.111 | 0.135 |
| **Piapung** | 0.026 | 0.055 | 0.031 | 0.315 | 0.315 | 0.002 | 0.48 | 0.125 | 0.011 |
| **Missasso** |  |  |  |  |  |  |  |  | 0.149 |
| **Kirare** |  |  |  |  |  |  |  |  | 0.022 |
| **Peneng** |  |  |  |  |  |  |  |  | 0.878 |
| **Dozanso** |  |  |  |  |  |  |  |  | 0.215 |
|  | ***MDA round wise and overall Monte Carlo p-values for post MDA data*** | | | | | | | | | |
|  | **1st** | **2nd** | **3rd** | **4th** | **5th** | **6th** | **7th** | **8th** | **Overall** |
| **DokanTofa** |  |  | 1.0 | 0.974 | 1.0 | 0.907 | 0.977 |  | 1.0 |
| **Piapung** |  |  | 1.0 | 1.0 | 1.0 |  | 1.0 |  | 1.0 |
| **Missasso** | 0.91 |  |  |  |  |  | 0.884 |  | 0.815 |
| **Kirare** | 0.99 | 0.994 | 1.0 |  | 1.0 | 0.986 | 0.998 |  | 0.972 |
| **Peneng** | 0.761 | 0.938 | 0.249 | 0.122 | 0.508 | 0.273 |  |  | 0.671 |
| **Dozanso** | 0.952 |  |  |  |  |  | 0.878 |  | 0.865 |

## References

1. Gambhir, M. & Michael, E. Complex ecological dynamics and eradicability of the vector borne macroparasitic disease, lymphatic filariasis. *PLoS One* **3**, e2874 (2008).

2. Gambhir, M. Geographic and ecologic heterogeneity in elimination thresholds for the major vector-borne helminthic disease, lymphatic filariasis. *BMC Biol.* **8**, 1 (2010).

3. Michael, E. *et al*. Mathematical modelling and the control of lymphatic filariasis. *Lancet Infect. Dis.* **4**, 223-234 (2004).

4. Michael, E., Malecela-Lazaro, M. N., Kabali, C., Snow, L. C. & Kazura, J. W. Mathematical models and lymphatic filariasis control: endpoints and optimal interventions. *Trends Parasitol.* **22**, 226-233 (2006).

5. Singh, B. K. et al. Sequential modelling of the effects of mass drug treatments on anopheline

mediated lymphatic filariasis infection in Papua New Guinea. *PLoS One* **8**, e67004 (2013).

6. Singh, B. K. & Michael, E. Bayesian calibration of simulation models for supporting management of the elimination of the macroparasitic disease, Lymphatic Filariasis. *Parasit Vectors* **8**, 1-26 (2015).

7. Michael, E. & Singh, B. K. Heterogeneous dynamics, robustness/fragility trade-offs, and the eradication of the macroparasitic disease, lymphatic filariasis. *BMC Med.* **14**, 1 (2016).

8. Chan, M. S. *et al*. Epifil: a dynamic model of infection and disease in lymphatic filariasis. *Am. J. Trop. Med. Hyg.* **59**, 606-614 (1998).

9. Norman, R. *et al*. EPIFIL: the development of an age-structured model for describing the transmission dynamics and control of lymphatic filariasis. *Epidemiol. Infect.* **124**, 529-541 (2000).

10. Rajagopalan, P. Population dynamics of culex pipiens fatigans, the filariasis vector, in pondicherry: influence of climate and environment. *Proc. Ind. Nat. Science Acad. B* **46**, 745-752 (1980).

11. Subramanian, S., Manoharan, A., Ramaiah, K. D. & Das, P. K. Rates of acquisition and loss of Wuchereria bancrofti infection in Culex quinquefasciatus. *Am. J. Trop. Med. Hyg.* **51**, 244-249 (1994).

12. Scott, A. L. & Nutman, T. Lymphatic-dwelling filariae. *Lymphatic filariasis.*, 5-39 (2000).

13. Vanamail, P., Subramanian, S., Das, P. K., Pani, S. P. & Rajagopalan, P. K. Estimation of fecundic life span of Wuchereria bancrofti from longitudinal study of human infection in an endemic area of Pondicherry (south India). *Indian J. Med. Res.* **91**, 293-297 (1990).

14. Evans, D. B., Gelband, H. & Vlassoff, C. Social and economic factors and the control of lymphatic filariasis: a review. *Acta Trop.* **53**, 1-26 (1993).

15. Ottesen, E. & Ramachandran, C. Lymphatic filariasis infection and disease: control strategies. *Parasitol. Today* **11**, 129-130 (1995).

16. Vanamail, P. *et al*. Estimation of the fecund life span of Wuchereria bancrofti in an endemic area. *Trans. R. Soc. Trop. Med. Hyg.* **90**, 119-121 (1996).

17. Hairston, N. G. & de Meillon, B. On the inefficiency of transmission of Wuchereria bancrofti from mosquito to human host. *Bull. World Health Organ.* **38**, 935-941 (1968).

18. Subramanian, S. *et al*. The relationship between microfilarial load in the human host and uptake and development of Wuchereria bancrofti microfilariae by Culex quinquefasciatus: a study under natural conditions. *Parasitology* **116**, 243-255 (1998).

19. Subramanian, S., Pani, S., Das, P. & Rajagopalan, P. Bancroftian filariasis in Pondicherry, south India: 2. Epidemiological evaluation of the effect of vector control. *Epidemiol. Infect.* **103**, 693-702 (1989).

20. Das, P. *et al*. Bancroftian filariasis in Pondicherry, south India–epidemiological impact of recovery of the vector population. *Epidemiol. Infect.* **108**, 483-493 (1992).

21. Ho, B. C. & Ewert, A. Experimental transmission of filarial larvae in relation to feeding behaviour of the mosquito vectors. *Trans. R. Soc. Trop. Med. Hyg.* **61**, 663-666 (1967).

22. May, R. M. Togetherness among schistosomes: its effects on the dynamics of the infection. *Math. Biosci.* **35**, 301-343 (1977).

23. Duerr, H., Dietz, K. & Eichner, M. Determinants of the eradicability of filarial infections: a conceptual approach. *Trends Parasitol.* **21**, 88-96 (2005).

24. Michael, E. et al., Quantifying the value of surveillance data for improving model predictions of lymphatic filariasis elimination. *PLoS Negl. Trop. Dis.*, **12(10)**, e0006674 (2018).

25. Griffin, J. T. et al. Reducing Plasmodium falciparum malaria transmission in Africa: a model-based evaluation of intervention strategies. *PLoS Med.* **7**, e1000324 (2010).

26. Okumu, F. O. & Moore, S. J. Combining indoor residual spraying and insecticide-treated nets for malaria control in Africa: a review of possible outcomes and an outline of suggestions for the future. *Malar. J.* **10,** 1 (2011).
